## Retraction

# Retraction: Effects of microRNA-146a on the proliferation and apoptosis of human osteoarthritis chondrocytes by targeting *TRAF6* through the NF- $\kappa$ B signaling pathway

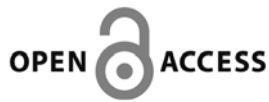

This Retraction follows an Expression of Concern relating to this article previously published by Portland Press.

This article is being retracted from *Bioscience Reports* at the request of the Editor-in-Chief and the Editorial Board following receipt of a notification from a reader, alerting the Editorial Board to the GAPDH Western blots in Figure 5B which are duplicated in several other publications.

The authors have been contacted in regards to the retraction, and have not responded to the Journal's queries and the concerns raised. Given the extent of the issues raised, the Editorial Board stand by the decision to retract the article.

Version of Record published:  
08 June 2021
